# Supplementary material for: DeepFly3D, a deep learning-based approach for 3D limb and appendage tracking in tethered, adult Drosophila
Source: eLife journal article supplement (doi:10.7554/elife.48571), 2019-10-04
Supplement: supp [file elife-48571-supp-v1.zip]

Archive with 8 entries (8 files):
- elife_poa_e48571_Figure_5_video_3.mp4
- elife_poa_e48571_Figure_5_video_4.mp4
- elife_poa_e48571_Transparent_Reporting_File.pdf
- elife_poa_e48571_Figure_5_video_2.mp4
- elife_poa_e48571_Figure_1_video_1.mp4
- elife_poa_e48571_Figure_5_video_6.mp4
- elife_poa_e48571_Figure_5_video_1.mp4
- elife_poa_e48571_Figure_5_video_5.mp4
